# Supplementary material for: The Effect of Temperature-Assisted High Hydrostatic Pressure on the Survival of Alicyclobacillus acidoterrestris Inoculated in Orange Juice throughout Storage at Different Isothermal Conditions
Source: MDPI journal article supplement (doi:10.3390/fermentation8070308), 2022-06-29
Supplement: s1 [file s1]

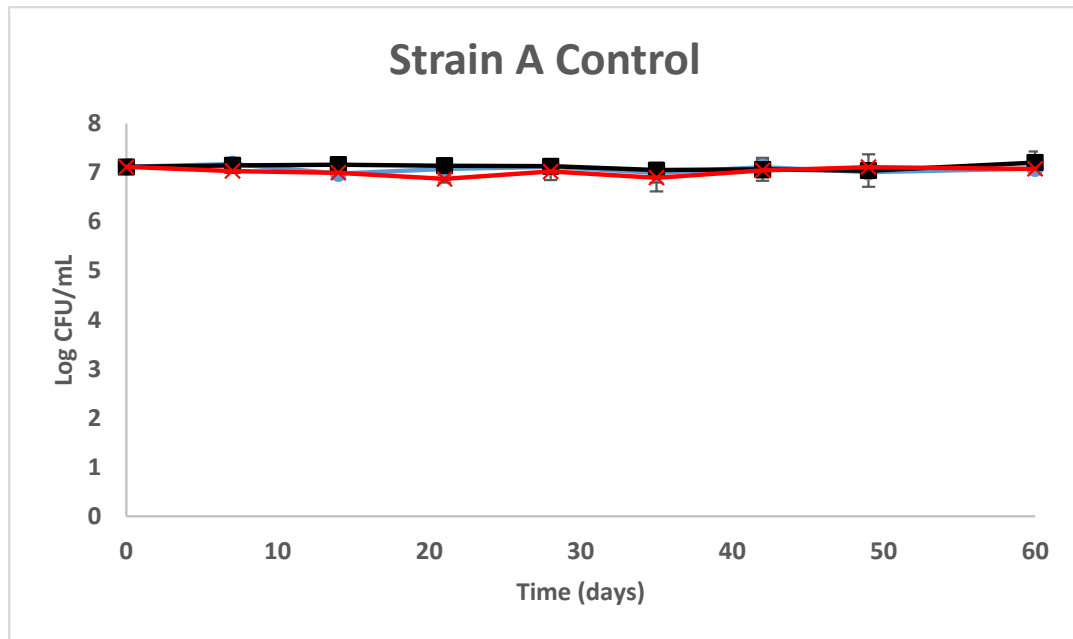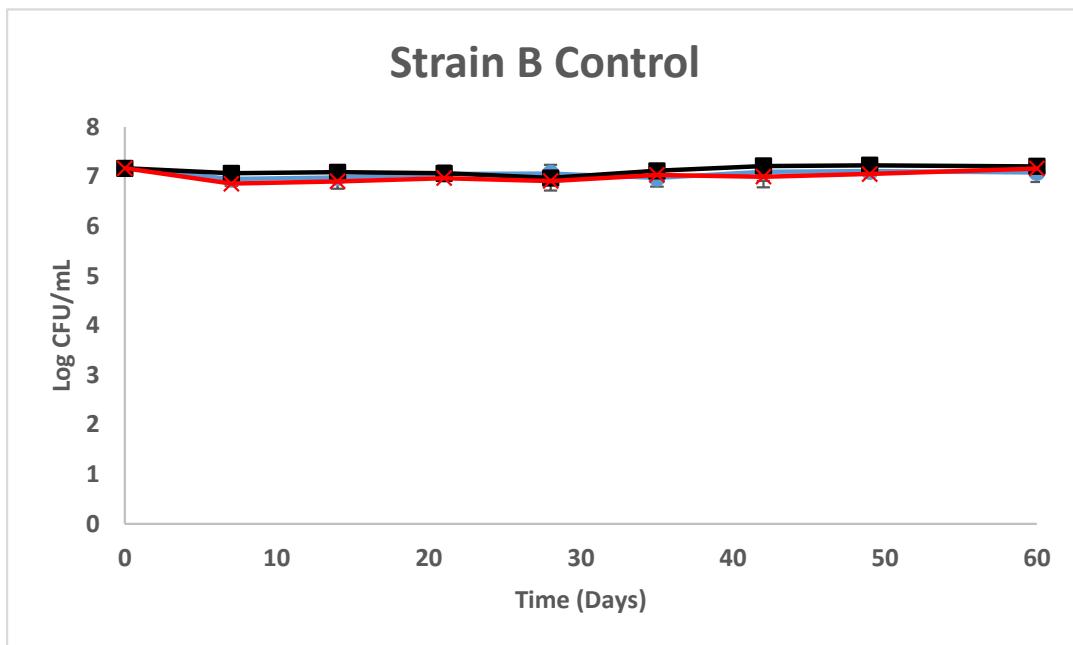

**Figure S1.** Survival curves of non HHP treated (control) *A. acidoterrestris* spores of Strain A and Strain B stored at 4 °C (●), 12 °C (■) and 25 °C (×). Data points are mean values ± standard deviation of duplicate samples from two independent experiments ( $n = 4$ ).

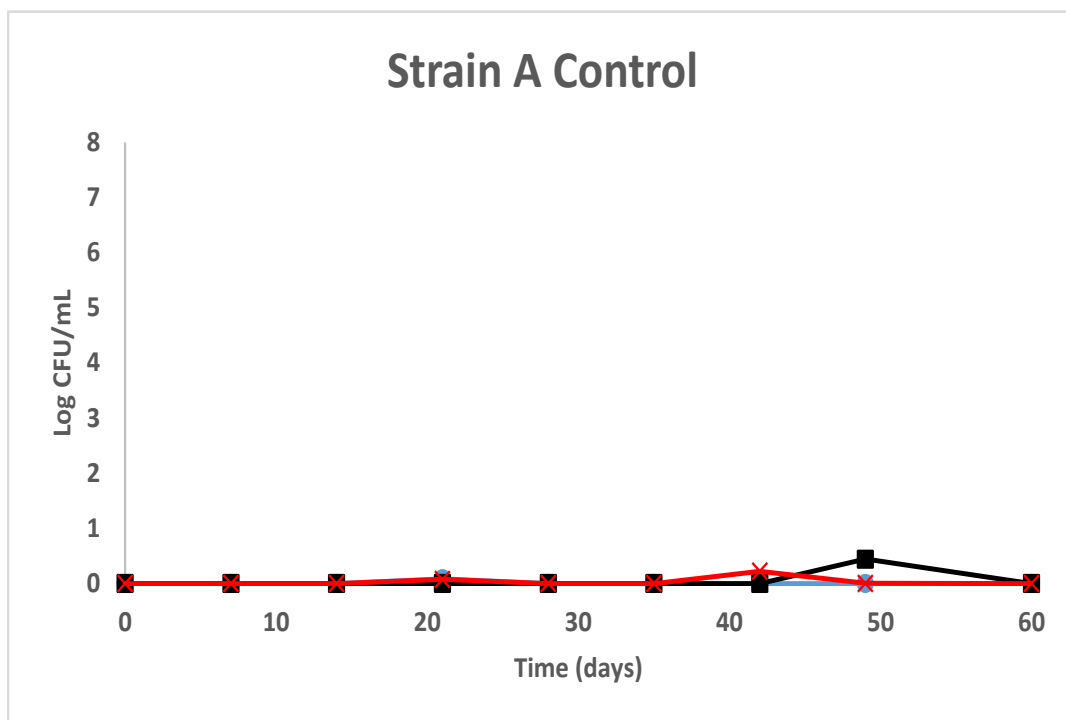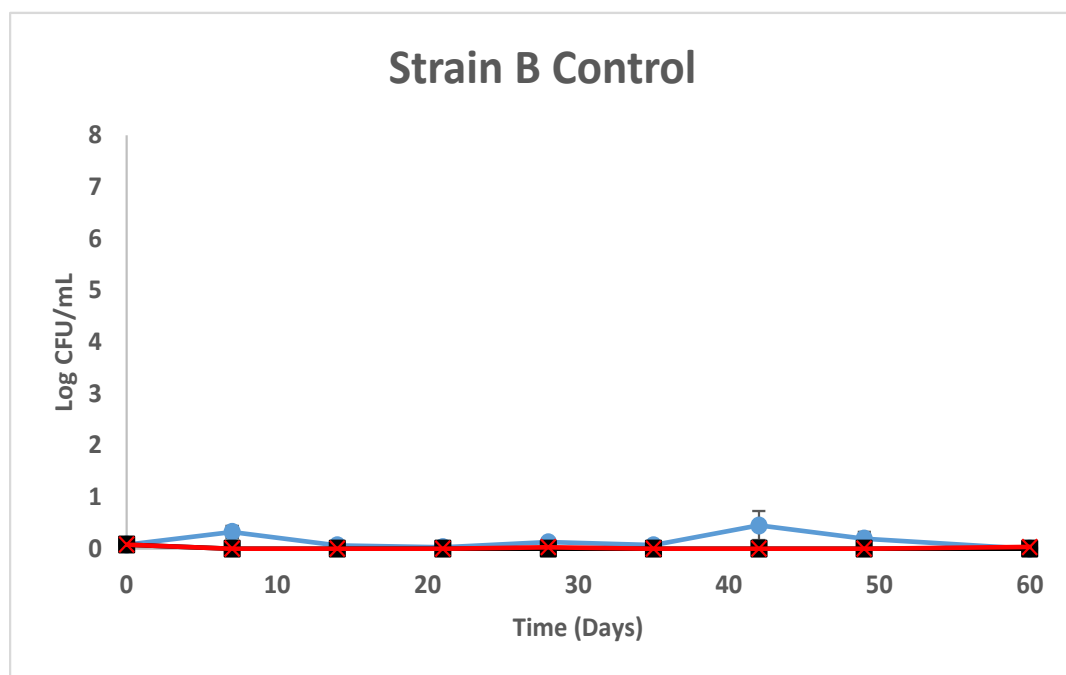

**Figure S2.** Survival curves of non HHP treated (control) *A. acidoterrestris* vegetative cells of Strain A and Strain B stored at 4 °C (●), 12 °C (■) and 25 °C (×). Data points are mean values ± standard deviation of duplicate samples from two independent experiments ( $n = 4$ ).
